# Supplementary material
Source: Springer Nature journal article supplement (https://www.springermedizin.de/resource/supplementary/12935_2009_215_MOESM5_ESM.pdf/9541334)

325 RFP3+Ketone

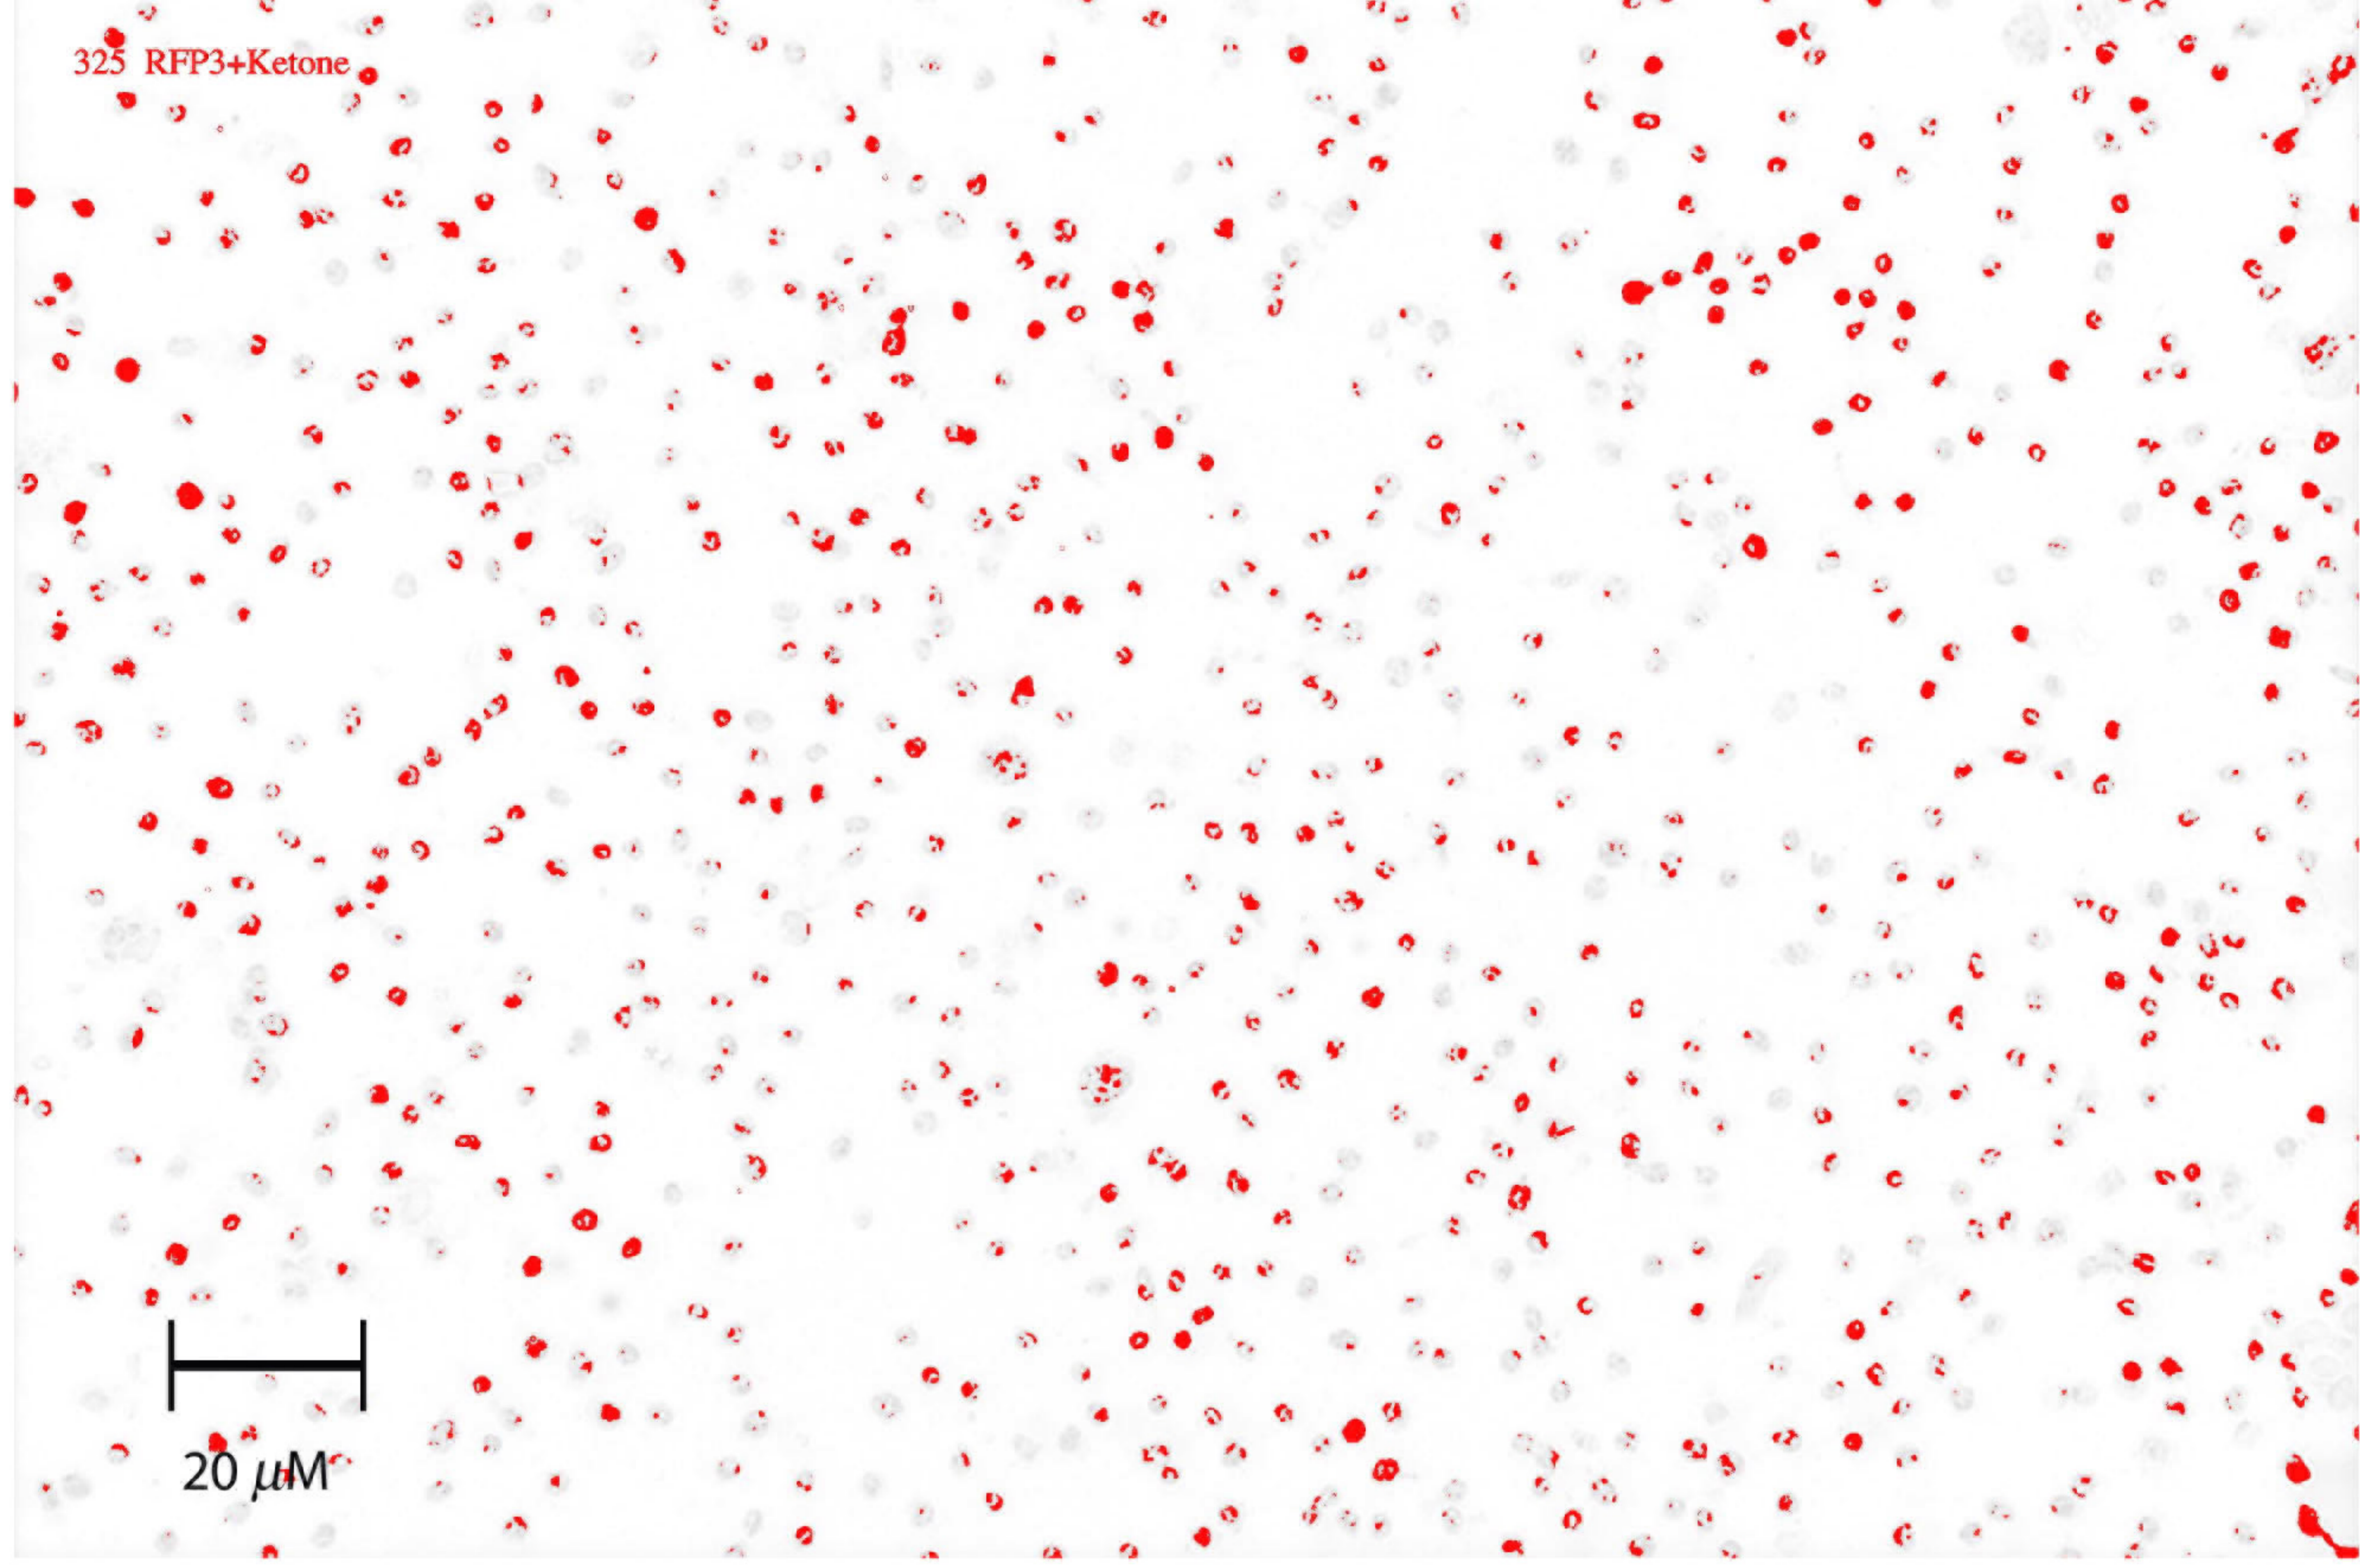

MDA MB231+Ketone

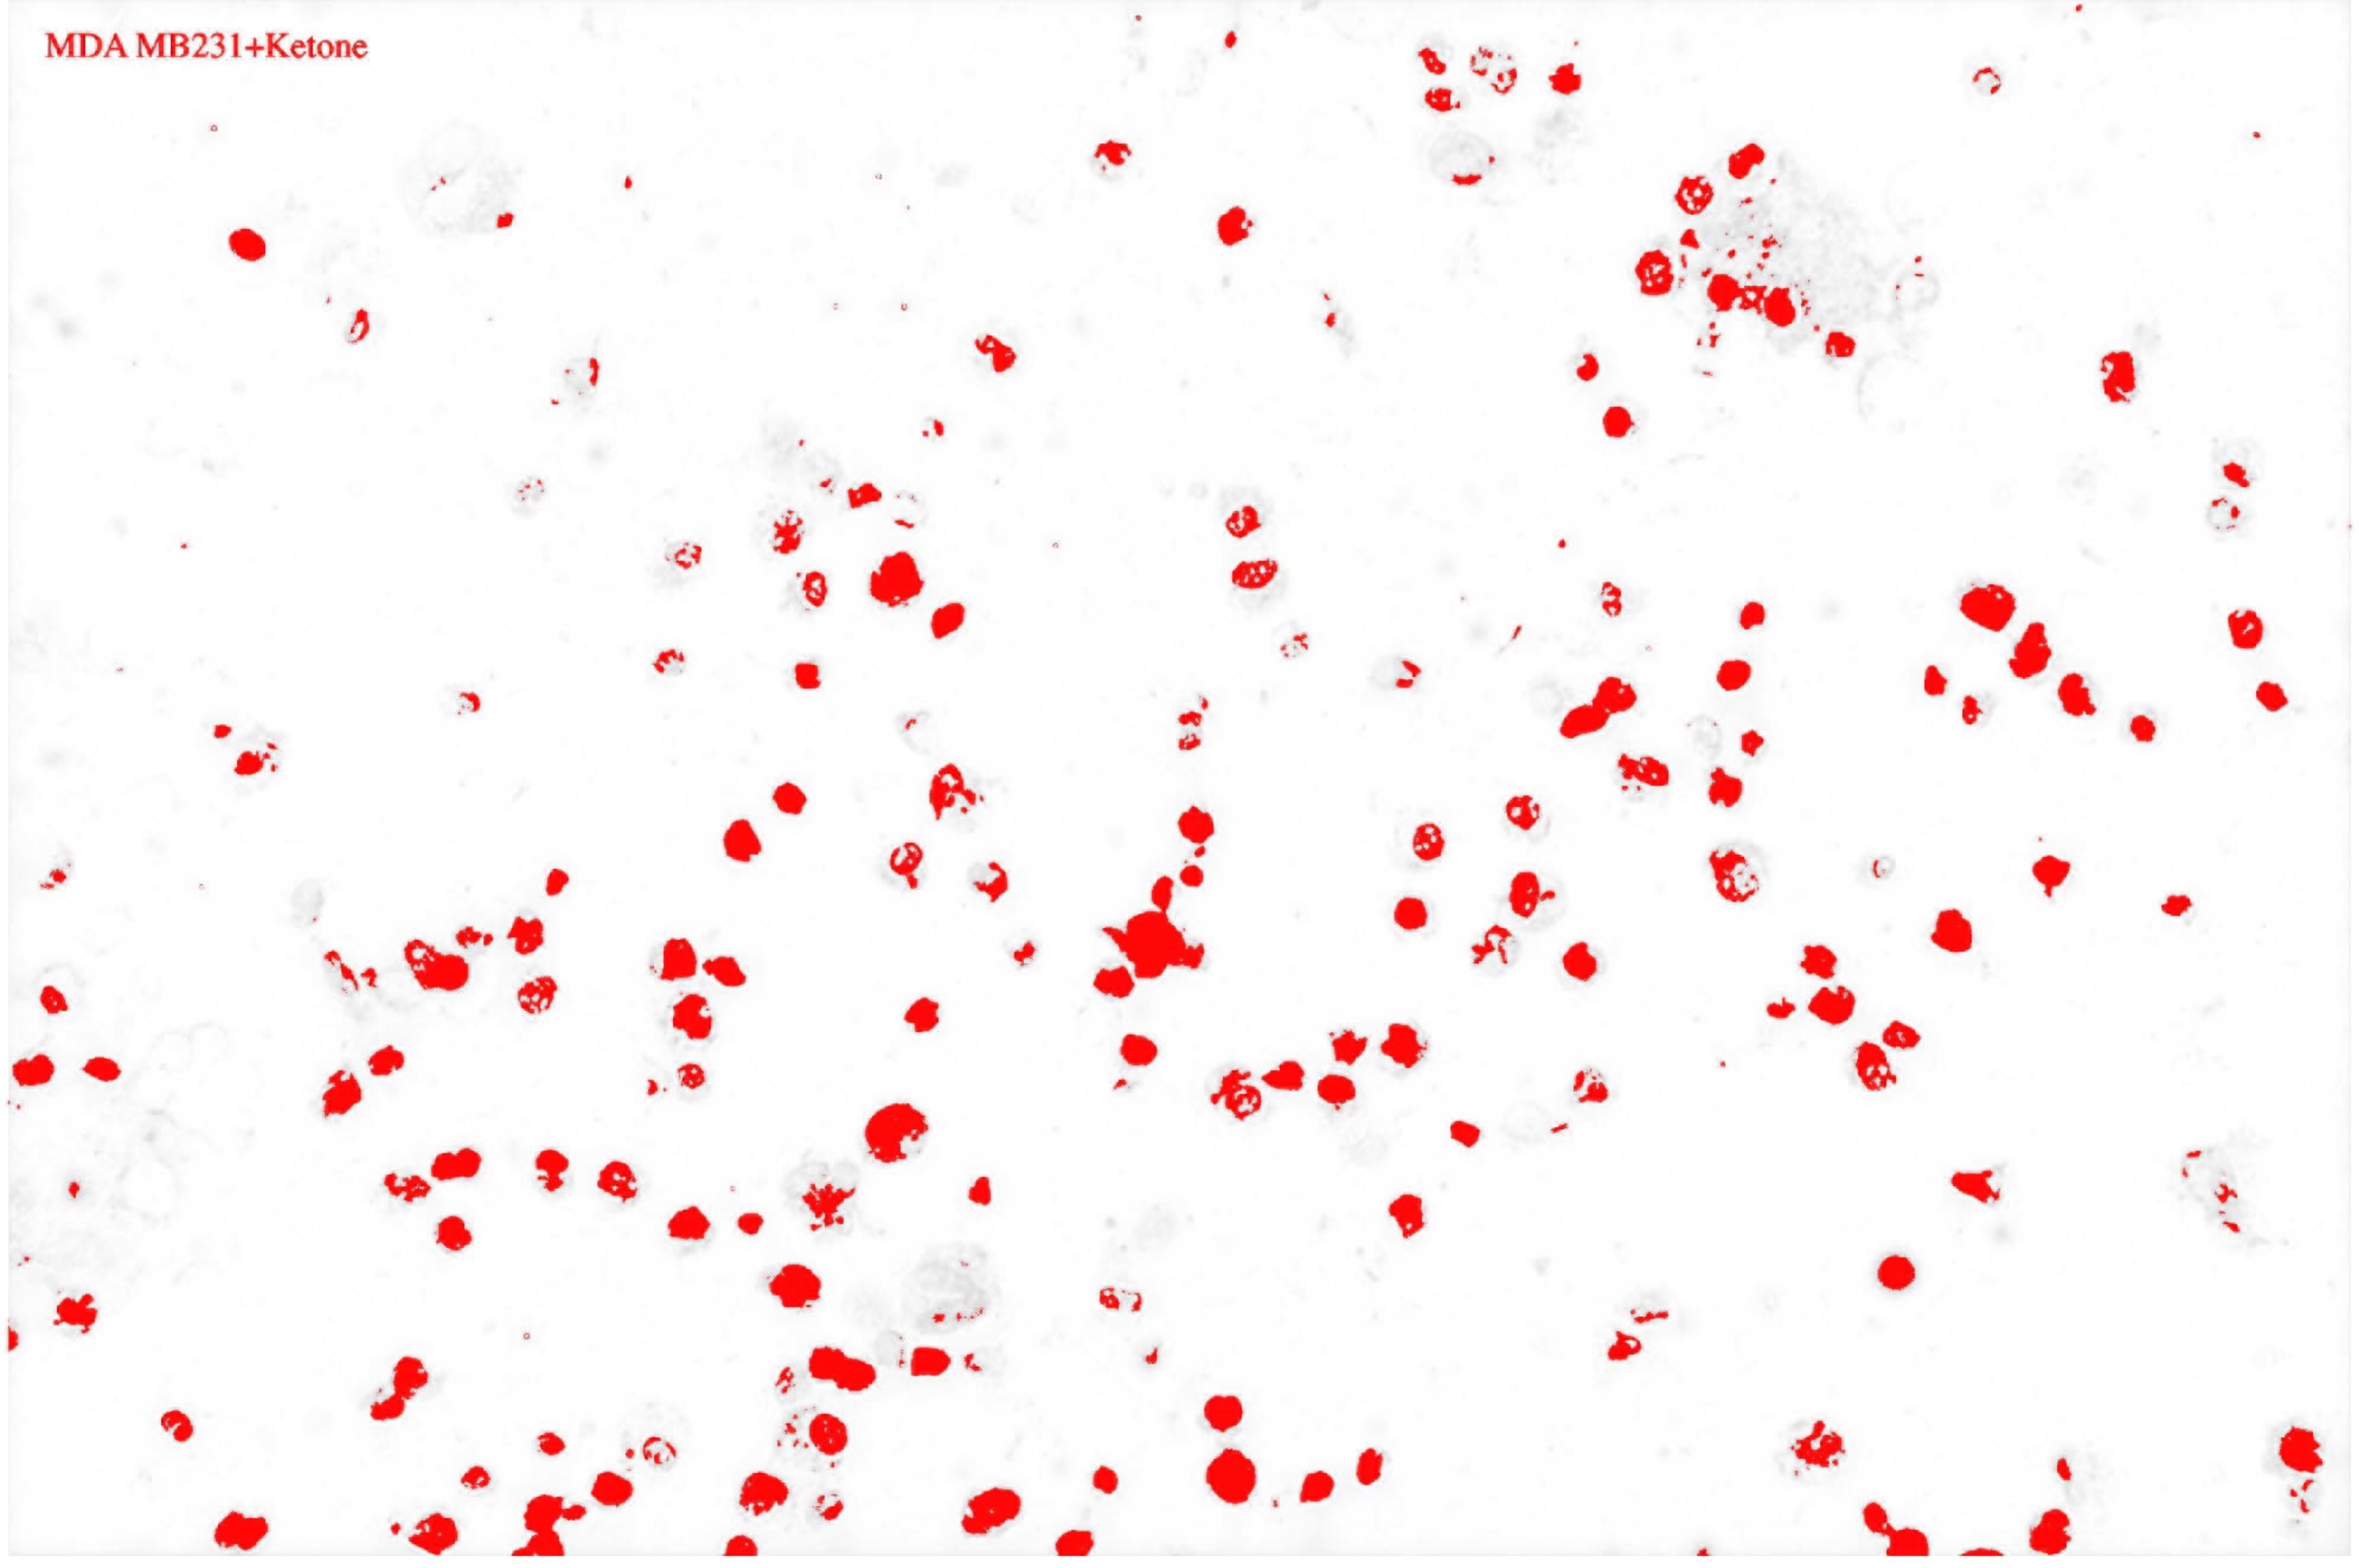

Supplement: MOESM5 [file 9541334]
